# Supplementary material for: The DNA-forming properties of 6-selenoguanine
Source: Royal Society of Chemistry journal article supplement (doi:10.1039/c3cp53885k), 2013-11-11
Supplement: c3cp53885k.pdf [file c3cp53885k.pdf]

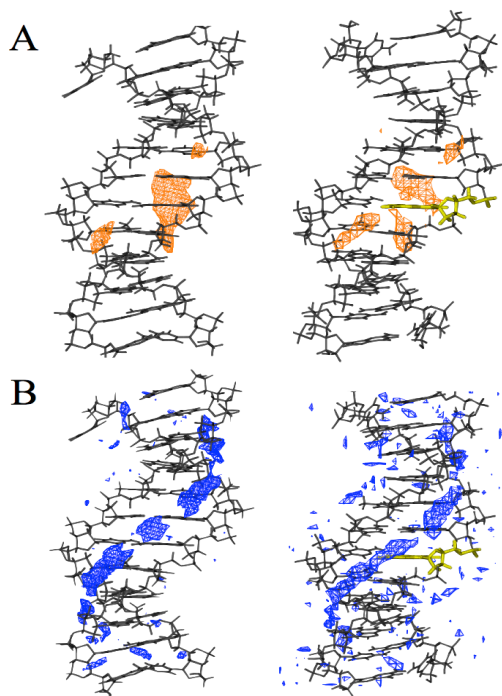

Figure S1. MIP profiles and solvation maps for duplex (left) and Se-duplex (right) molecules. (A) The probe molecule for MIP calculations was  $\text{Na}^+$  and the depicted contour corresponds to -4.5 kcal/mol. (B) Solvation maps depicted with contours at 2.0 g/mL density. The 6-selenoguanine residue is depicted in yellow.

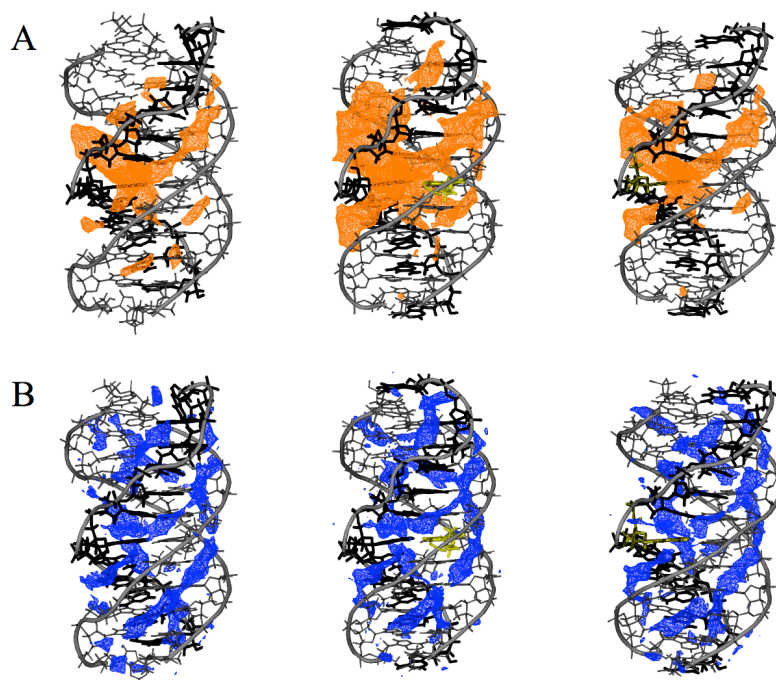

Figure S2. MIP profiles (A) and solvation maps (B) for canonical (left), WC-modified (center) and H-modified (right) triplexes. (A) The probe molecule for MIP calculations was  $\text{Na}^+$  and the depicted contour corresponds to  $-6$  kcal/mol. (B) Solvation maps depicted with contours at  $2.0$  g/mL density. The Hoogsteen strand is depicted in black while the 6-selenoguanine residue is depicted here in yellow.

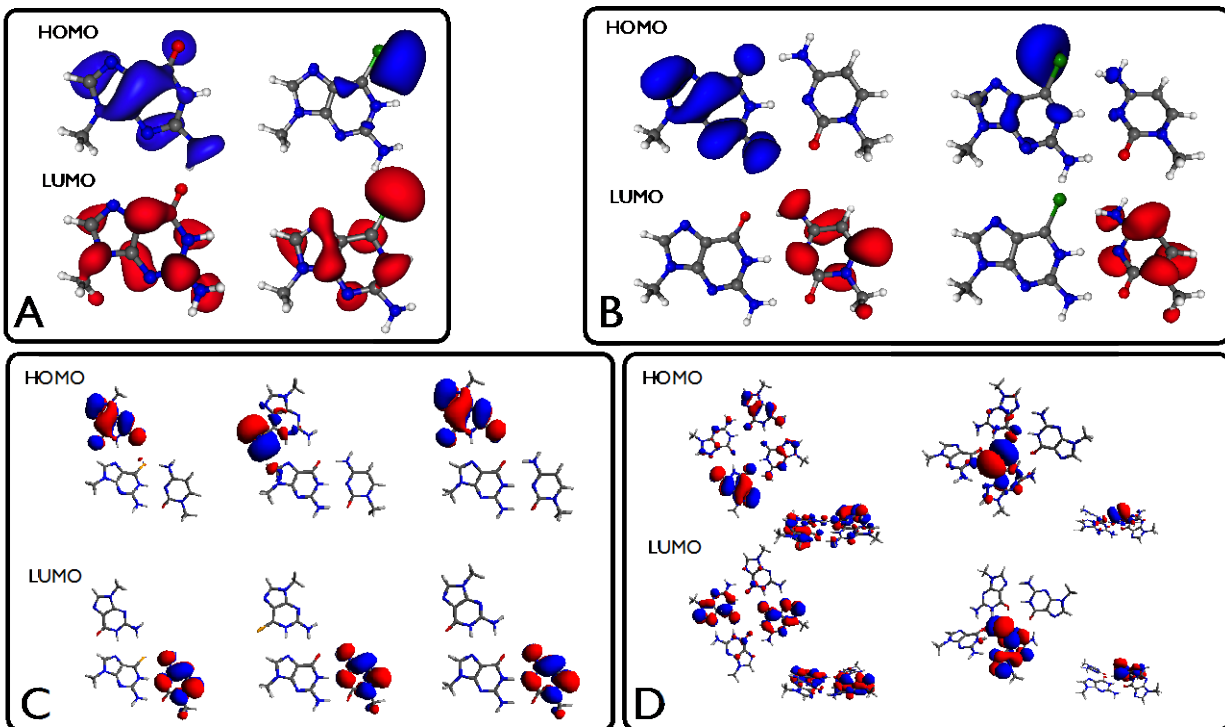

Figure S3. SVWN5/6-31++G(d,p) contour plot (isovalue at 0.02 au) of HOMO (blue) and LUMO (red) for monomers (A), H-bonded dimers (B; G·C dimer on the left and SeG·C dimer on the right), H-bonded triads (C; C·SeG#G triad on the left, C·G#SeG triad in the center and C·G#G on the right) and G-quartets (D; G4 on the left and G4 with one SeG on the right).

|             | MP2/6-31G(d,p) | MP2/cc-<br>pVDZ | MP2/cc-<br>pVTZ | MP2/cc-<br>pVQZ | CCSD(T)/C<br>BS |
|-------------|----------------|-----------------|-----------------|-----------------|-----------------|
| 1H-2c6c-SeG | 22.8           | 21.5            | 21.3            | 21.2            | 21.4            |
| 1H-2c6t-SeG | 22.8           | 21.5            | 21.4            | 21.2            | 21.4            |
| 1H-2t6c-SeG | 17.2           | 16.6            | 16.6            | 16.6            | 16.7            |
| 1H-2t6t-SeG | 20.0           | 19.2            | 19.0            | 18.9            | 18.9            |
| 1H-SeG      | 0.0            | 0.0             | 0.0             | 0.0             | 0.0             |
| 3H-2c6c-SeG | 20.3           | 19.8            | 19.9            | 19.9            | 19.9            |
| 3H-2c6t-SeG | 20.3           | 19.5            | 19.3            | 19.1            | 19.2            |
| 3H-2t6c-SeG | 23.7           | 22.6            | 22.9            | 22.9            | 23.1            |
| 3H-2t6t-SeG | 27.8           | 26.7            | 26.4            | 26.2            | 26.3            |
| 3H-SeG      | 17.7           | 17.4            | 17.3            | 17.2            | 17.4            |
| 6c-SeG      | -7.0           | -7.6            | -6.5            | -6.2            | -6.1            |
| 6t-SeG      | -7.4           | -8.3            | -7.5            | -7.3            | -7.2            |

Table S1. Tautomerization free energies (kcal/mol) relative to the 1H-SeG tautomer at different levels of theory.

|             | $\mu_{vac}$ | $\Delta\mu$ |
|-------------|-------------|-------------|
| 1H-2c6c-SeG | 4.7         | 1.5         |
| 1H-2c6t-SeG | 4.7         | 1.5         |
| 1H-2t6c-SeG | 3.6         | 0.5         |
| 1H-2t6t-SeG | 4.9         | 1.4         |
| 1H-SeG      | 9.1         | 3.2         |
| 3H-2c6c-SeG | 6.3         | 2.1         |
| 3H-2c6t-SeG | 7.4         | 2.7         |
| 3H-2t6c-SeG | 8.8         | 3.2         |
| 3H-2t6t-SeG | 9.8         | 3.7         |
| 3H-SeG      | 13.0        | 6.2         |
| 6c-SeG      | 4.0         | 1.2         |
| 6t-SeG      | 4.5         | 1.5         |

Table S2. Gas phase and difference between water-induced and gas phase dipole moments (in Debye) for the SeG tautomers. The values in gas phase and in water solution were determined at the MP2/cc-pVQZ and the B3LYP/cc-pVQZ levels of theory respectively.

|         | Rise       |            | Roll        |             | Twist      |            |
|---------|------------|------------|-------------|-------------|------------|------------|
|         | Duplex     | Se-duplex  | Duplex      | Se-duplex   | Duplex     | Se-duplex  |
| 6-GX/CC | 3.6 ± 0.4  | 3.6 ± 0.4  | 6.3 ± 5.4   | 5.0 ± 5.5   | 30.9 ± 5.2 | 32.3 ± 5.1 |
| 7-XA/TC | 3.3 ± 0.3  | 3.3 ± 0.3  | 2.6 ± 5.5   | 0.7 ± 6.0   | 33.9 ± 5.2 | 32.7 ± 5.2 |
|         | Stretch    |            | Buckle      |             | Opening    |            |
|         | Duplex     | Se-duplex  | Duplex      | Se-duplex   | Duplex     | Se-duplex  |
| 6-GC    | 0.02 ± 0.1 | 0.02 ± 0.1 | 5.6 ± 9.8   | 4.2 ± 9.9   | 1.0 ± 3.2  | 1.2 ± 3.2  |
| 7-XC    | 0.03 ± 0.1 | 0.24 ± 0.1 | -4.9 ± 12.4 | -6.7 ± 12.1 | 1.6 ± 3.7  | 6.2 ± 3.8  |
| 8-AT    | 0.04 ± 0.1 | 0.04 ± 0.1 | -1.4 ± 12.5 | -6.0 ± 11.5 | 3.2 ± 5.9  | 3.3 ± 6.1  |

Table S3. Averaged values and standard errors of selected helical parameters calculated for duplex structures (X stands for G or SeG) and adjacent base pairs using the Curves+ program (see Methods).

| WC      | triplex    | Rise          |               |            | Roll          |               |            | Twist         |               |         |
|---------|------------|---------------|---------------|------------|---------------|---------------|------------|---------------|---------------|---------|
|         |            | WC-Se-triplex | rH-Se-triplex | triplex    | WC-Se-triplex | rH-Se-triplex | triplex    | WC-Se-triplex | rH-Se-triplex | triplex |
| 6-CT/AX | 3.4 ± 0.3  | 3.7 ± 0.4     | 3.4 ± 0.4     | -0.7 ± 4.4 | -1.2 ± 5.3    | 0.6 ± 4.7     | 28.0 ± 3.5 | 24.4 ± 3.2    | 25.2 ± 3.7    |         |
| 7-TC/XA | 3.3 ± 0.3  | 3.4 ± 0.3     | 3.2 ± 0.3     | -0.4 ± 5.0 | -2.8 ± 5.2    | -2.3 ± 5.6    | 33.9 ± 3.9 | 33.1 ± 4.1    | 32.6 ± 3.8    |         |
| WC      | triplex    | Stretch       |               |            | Buckle        |               |            | Opening       |               |         |
|         |            | WC-Se-triplex | rH-Se-triplex | triplex    | WC-Se-triplex | rH-Se-triplex | triplex    | WC-Se-triplex | rH-Se-triplex | triplex |
| 6-TA    | 0.04 ± 0.1 | 0.04 ± 0.2    | 0.04 ± 0.3    | -5.5 ± 9.3 | -1.7 ± 8.9    | -9.0 ± 7.1    | 1.2 ± 5.7  | 4.2 ± 7.1     | 1.8 ± 10.3    |         |
| 7-CX    | 0.03 ± 0.1 | 0.31 ± 0.1    | 0.05 ± 0.1    | 2.9 ± 9.1  | 9.3 ± 9.0     | 0.6 ± 8.7     | 1.3 ± 3.1  | 7.8 ± 3.4     | 1.9 ± 3.2     |         |
| 8-TA    | 0.03 ± 0.1 | 0.07 ± 0.2    | 0.04 ± 0.2    | 0.2 ± 8.6  | -1.3 ± 8.7    | 0.2 ± 9.8     | 5.6 ± 5.1  | 8.0 ± 5.9     | 6.7 ± 5.5     |         |

Table S4. Averaged values and standard errors of selected helical parameters for the WC duplex calculated for triplex structures (X stands for G or SeG) and adjacent base pairs using the Curves+ program (see Methods).

| rH      | Rise        |               |               | Roll        |               |               | Twist        |               |               |
|---------|-------------|---------------|---------------|-------------|---------------|---------------|--------------|---------------|---------------|
|         | triplex     | WC-Se-triplex | rH-Se-triplex | triplex     | WC-Se-triplex | rH-Se-triplex | triplex      | WC-Se-triplex | rH-Se-triplex |
| 6-AX/XA | 3.1 ± 0.2   | 3.1 ± 0.3     | 3.4 ± 0.4     | -3.7 ± 6.1  | -1.6 ± 6.4    | -2.6 ± 7.3    | 27.9 ± 4.6   | 28.5 ± 5.0    | 22.8 ± 14.3   |
| 7-XA/AX | 3.3 ± 0.3   | 3.3 ± 0.3     | 3.3 ± 0.3     | 13.1 ± 8.4  | 10.5 ± 8.6    | 11.3 ± 7.8    | 26.4 ± 3.5   | 27.4 ± 4.0    | 23.6 ± 3.2    |
| rH      | Stretch     |               |               | Buckle      |               |               | Opening      |               |               |
|         | triplex     | WC-Se-triplex | rH-Se-triplex | triplex     | WC-Se-triplex | rH-Se-triplex | triplex      | WC-Se-triplex | rH-Se-triplex |
| 6-AA    | 0.82 ± 0.3  | 1.00 ± 0.4    | 0.84 ± 2.8    | -18.2 ± 9.6 | -18.9 ± 12.9  | -13.9 ± 12.5  | -99.7 ± 4.9  | -102.2 ± 5.3  | -99.2 ± 28.6  |
| 7-XX    | -0.89 ± 0.4 | -0.79 ± 0.5   | -1.21 ± 0.3   | 9.4 ± 11.0  | 7.0 ± 11.9    | 8.9 ± 13.8    | -105.5 ± 5.3 | -109.9 ± 5.8  | -103.7 ± 7.0  |
| 8-AA    | 1.29 ± 0.4  | 1.19 ± 0.5    | 1.31 ± 0.4    | -20.8 ± 9.3 | -23.3 ± 10.3  | -20.8 ± 10.9  | -105.5 ± 6.2 | -105.4 ± 7.5  | -103.2 ± 5.7  |

Table S5. Averaged values and standard errors (in parenthesis) of selected helical parameters for the rH duplex calculated for triplex structures (X stands for G or SeG) and adjacent base pairs using the Curves+ program (see Methods).
